# Supplementary material for: Interfacial tension and CO2 diffusion coefficients for a CO2 + water and n-decane system at pressures of 10 to 160 bar
Source: Royal Society of Chemistry journal article supplement (doi:10.1039/c8ra03690j), 2018-01-01
Supplement: c8ra03690j1.xlsx [file c8ra03690j1.xlsx]

## Sheet: Figure 4A
	Relative volume (low-density)
		10 bar	20 bar	30 bar	40 bar	50 bar	60 bar
	5	50.6351	49.5	50.0689	50.3396	52.1	53.6538
	15	51.12	50.34	52.7246	52.3052	55.23	57.34
	30	51.49	53.5412	55.8725	55.0635	57.13	59.4375
	45	51.7681	54.7837	56.6586	56.1713	58.41	60.8335
	60	51.89	55.2417	56.873	57.3111	59.56	62.6627
	75	51.95	55.5417	56.9359	57.5061	60.21	63.51
	90	51.99	55.5417	57.0299	57.919	60.78	64.57
	105	52.005	55.5417	57.0181	58.1249	60.98	64.98
	120	52.015	55.5417	57.0893	58.4922	61.23	65.35
	135	52.02	55.5417	57.1088	58.7302	61.5	65.57
	150	52.025	55.5417	57.1286	58.9011	61.5	65.57
	165	52.025	55.5417	57.1286	59.1875	61.5	65.57
	180	52.025	55.5417	57.1286	59.1875	61.5	65.57
	200	52.025	55.5417	57.1286	59.1875	61.5	65.57
	220	52.025	55.5417	57.1286	59.1875	61.5	65.57
	240	52.025	55.5417	57.1286	59.1875	61.5	65.57
	260	52.025	55.5417	57.1286	59.1875	61.5	65.57
	280	52.025	55.5417	57.1286	59.1875	61.5	65.57
	320	52.025	55.5417	57.1286	59.1875	61.5	65.57
	360	52.025	55.5417	57.1286	59.1875	61.5	65.57
	385	52.025	55.5417	57.1286	59.1875	61.5	65.57
	400	52.025	55.5417	57.1286	59.1875	61.5	65.57

## Sheet: Figure 4B
									Relative volume (high-density)
												25C				25C
									Time (min)	70 bar	80 bar	90 bar	100 bar	Time (min)	120 bar	140 bar	160 bar
									5	52.34	49.804	48.32	47.54	5	43.4944	45.5004	50.347
									15	50.12	47.1109	43.89	41.3044	20	40.1843	43.6138	48.54
									30	46.67	41.7469	38.9822	37.56	40	38.1508	40.5183	44.7488
									45	43.6342	40.2312	36.8394	35.4575	60	35.7148	37.592	42.9551
									60	42.9677	38.6962	35.56	34.3443	80	34.5861	35.7534	40.612
									75	42.94	37.1332	35.12	33.7366	100	34.1919	34.3787	39.3731
									90	43.0464	36.5581	34.5112	33.3547	120	33.6315	33.9048	37.7416
									105	43.2423	36.2101	34.3942	33.0257	140	33.0979	33.3366	36.7928
									120	43.3614	35.9466	34.1484	32.7957	160	32.5722	33.0642	36.0407
									135	43.3927	35.8022	33.714	32.234	180	32.3971	32.061	35.4826
									150	43.34	35.7454	33.2156	32.3252	200	32.0223	31.9994	34.7776
									165	43.3854	35.7454	32.7242	32.3992	230	31.3436	31.6257	34.2232
									180	43.3484	35.7454	32.8595	32.1609	260	31.3436	31.5743	33.5688
									200	43.4551	35.7454	32.8595	31.93	290	31.3436	31.561	32.65
									220	43.189	35.7454	32.8595	31.93	320	31.3436	31.4849	32.6294
									240	42.9749	35.7454	32.8595	31.93	360	31.3436	31.0922	32.0744
									260	43.0022	35.7454	32.8595	31.93	400	31.3436	31.0922	31.8608
									280	43.1324	35.7454	32.8595	31.93
									320	43.2909	35.7454	32.8595	31.93
									360	43.2909	35.7454	32.8595	31.93
									385	43.2909	35.7454	32.8595	31.93
									400	43.2909	35.7454	32.8595	31.93

## Sheet: Figure 5A
	dynamic density difference 3P 25C (g/ml)
	Time (min)	10 bar	20 bar	30 bar	40 bar	50 bar	60 bar
	0	0.2702	0.26985	0.26951	0.26917	0.26885	0.26852
	15	0.267557	0.279097	0.283524	0.288788	0.290285	0.291766
	30	0.27237	0.294448	0.309927	0.325312	0.327025	0.328529
	45	0.276943	0.30669	0.331162	0.356305	0.360215	0.365059
	60	0.28184	0.316485	0.347464	0.381212	0.391055	0.400858
	75	0.286207	0.322577	0.359879	0.402823	0.422	0.430732
	90	0.289649	0.325972	0.368375	0.41829	0.441922	0.455447
	105	0.291747	0.329	0.376198	0.432914	0.465145	0.478815
	120	0.293026	0.330931	0.382208	0.444138	0.484979	0.498389
	135	0.294344	0.332281	0.386475	0.455264	0.495872	0.513918
	150	0.296032	0.333537	0.390025	0.461948	0.506477	0.528367
	170	0.296583	0.33399	0.393667	0.47116	0.518019	0.543752
	190	0.296933	0.334103	0.39694	0.477077	0.526254	0.557308
	210	0.297083	0.334103	0.399579	0.48068	0.533164	0.570009
	230	0.297083	0.334103	0.400809	0.48302	0.539304	0.580895
	250	0.297083	0.334103	0.401007	0.484525	0.541881	0.589645
	270	0.297083	0.334103	0.401007	0.485337	0.543833	0.598179
	300	0.297083	0.334103	0.401007	0.485603	0.544976	0.609642
	335	0.297083	0.334103	0.401007	0.485603	0.545005	0.617721
	375	0.297083	0.334103	0.401007	0.485603	0.545005	0.619945
	400	0.297083	0.334103	0.401007	0.485603	0.54755	0.619998

## Sheet: Figure 5B
									dynamic density difference 3P 25C (g/ml)
									Time (min)	70 bar	80 bar	90 bar	100 bar	120 bar	140 bar	160 bar
									5	0.263496	0.262725	0.262588	0.261712	0.266797	0.26554	0.265085
									15	0.267546	0.266159	0.265701	0.263969	0.26655	0.264234	0.263437
									30	0.271237	0.269217	0.267729	0.265219	0.266403	0.262396	0.261466
									45	0.274928	0.2727	0.27063	0.267504	0.26669	0.261021	0.260325
									60	0.276508	0.274147	0.271487	0.267943	0.267057	0.260381	0.259212
									75	0.277031	0.274608	0.271506	0.267727	0.266939	0.259181	0.258658
									90	0.27763	0.27533	0.271828	0.267867	0.267368	0.259251	0.258443
									105	0.278279	0.276108	0.272259	0.268057	0.267189	0.258294	0.257852
									120	0.278332	0.276284	0.272153	0.267729	0.266993	0.257655	0.257121
									135	0.278648	0.276733	0.272303	0.267935	0.266843	0.257154	0.256706
									150	0.278355	0.276558	0.272454	0.267533	0.266788	0.256853	0.256362
									170	0.278044	0.27643	0.272555	0.26735	0.26664	0.256424	0.256051
									190	0.277874	0.276418	0.272755	0.26735	0.266269	0.256213	0.255892
									210	0.277853	0.276418	0.272856	0.26735	0.266019	0.25614	0.255651
									230	0.277853	0.276418	0.273006	0.26735	0.265804	0.25599	0.255459
									250	0.277853	0.276418	0.273256	0.26735	0.265483	0.25599	0.255459

## Sheet: Figure 6
		IFT Co2-water-decane (3Phase)						IFT water-decane from literature
		P (bar)	25C	45C	25C			P (bar)	water-decane
		10	52.025	36.3	42.5			10	51.02			Figure 6 in the manuscript
		20	55.5417	39.75	46.7			20	51.032
		30	57.1286	42.68	49.8			40	51.064
		40	59.1875	51.43	51.5			60	51.096
		50	61.5	56.54	52.5			80	51.128
		60	65.57	63.76	58.75			100	51.16
		70		66.85	61.85			120	51.192
		70	48.23					140	51.224
		80	43.83		36.8			160	51.256
		90	41.65		32.9
		100	38.65		31.9
		120	36.55		31.05
		140	35.15		31.04
		160	35.2		31.15

## Sheet: Figure 7
				For plots change in Gibbs energy (J)
					25C	35C	45C
				10	-0.0790006	-0.0642286	-0.0742591
				20	-0.148836	-0.126134	-0.136962
				30	-0.189237	-0.167864	-0.176519
				40	-0.236838	-0.209291	-0.216255
				50	-0.316548	-0.300362	-0.279977
				60	-0.639715	-0.426631	-0.363488
				70		-0.706976	-0.538254
				70	-0.459608
				80	-0.517814		-0.31238
				90	-0.539331		-0.365094
				100	-0.546275		-0.44445
				120	-0.55482		-0.520777
				140	-0.57053		-0.55616
				160	-0.577263		-0.582341

## Sheet: Figure 8
		Diffusion coefficient (CHHC) 1e-10 (m2/min)
			25C	35C	45C
		10	0.7431	1.012	0.8528
		20	0.6413	0.8156	0.7162
		30	0.452	0.7148	0.6817
		40	0.3719	0.5368	0.6155
		50	0.3022	0.3491	0.5145
		60	0.2815	0.3154	0.4858
		70		0.2901	0.4352
		70	0.3043
		80	0.3178		0.4012
		90	0.3474		0.432
		100	0.3767		0.453
		120	0.4571		0.493
		140	0.4665		0.527
		160	0.4706		0.534

## Sheet: Figure 9A
				Cncentration gradient of CO2 (mol/ul)
		CWHC system					CHHC system
		time (min)	20 bar-2P	40 bar-2P	70 bar-2P	100 bar-2P	20 bar-3P	40 bar-3P	70 bar-3P	100 bar-3P
		0	9.4752e-05	0.00016496	0.000219808	0.000227408	0	0	0	0
		10	9.41918e-05	0.00016141	0.000201344	0.000205975	9.36733e-06	1.74207e-05	2.72101e-05	2.79041e-05
		50	9.40647e-05	0.000158289	0.000191273	0.000191139	3.74636e-05	6.83751e-05	9.50477e-05	9.61478e-05
		100	9.40647e-05	0.000157296	0.000188434	0.0001865	6.28805e-05	0.000114146	0.000147169	0.00015175
		200	9.40647e-05	0.000156728	0.000185877	0.000181915	8.17736e-05	0.000147288	0.000162503	0.000169575
		300	9.40647e-05	0.000156728	0.000185375	0.000181367	8.93537e-05	0.000154903	0.000173717	0.000177185
		400	9.40647e-05	0.000156728	0.000185375	0.000181367	9.20913e-05	0.000154903	0.000174717	0.000177185

## Sheet: Figure 9B
			CWHC system		CHHC system
		Time (min)	40 bar-2P	100 bar-2P	40 bar-3P	100 bar-3P
		0	1	1	1	1
		5	1.13947	1.10081	1.01123	1.01728
		10	1.20916	1.14417	1.02327	1.03105
		15	1.25221	1.17391	1.04031	1.04752
		20	1.28376	1.19269	1.05848	1.0644
		25	1.30946	1.2065	1.07787	1.07797
		30	1.32952	1.2169	1.09931	1.09163
		35	1.34979	1.22473	1.11502	1.10389
		40	1.36515	1.23375	1.13431	1.11705
		45	1.38186	1.23872	1.1537	1.1272
		50	1.39304	1.24397	1.17014	1.13765
		55	1.40569	1.24765	1.18534	1.14629
		60	1.41269	1.25226	1.19984	1.15754
		65	1.42021	1.25695	1.21749	1.16678
		70	1.42972	1.26017	1.23423	1.17362
		75	1.43233	1.26229	1.24627	1.17763
		80	1.4386	1.26653	1.25699	1.18336
		85	1.44152	1.26846	1.27057	1.18969
		90	1.44758	1.27159	1.28281	1.19492
		95	1.44905	1.27315	1.29639	1.19974
		100	1.45155	1.27518	1.30751	1.20436
		105	1.45667	1.27803	1.31925	1.20908
		110	1.46085	1.28116	1.32843	1.2128
		115	1.46403	1.28291	1.33997	1.21561
		120	1.46722	1.28466	1.34803	1.21993
		125	1.46858	1.28641	1.35853	1.22285
		130	1.47078	1.28816	1.36885	1.22717
		135	1.47172	1.28991	1.37947	1.22938
		140	1.47402	1.29166	1.3861	1.23109
		145	1.4782	1.29304	1.39171	1.2336
		150	1.47946	1.29442	1.39804	1.23661
		155	1.4805	1.2958	1.40753	1.23842
		160	1.48155	1.29718	1.4157	1.24123
		165	1.48259	1.29856	1.42141	1.24395
		170	1.48384	1.29994	1.42692	1.24545
		175	1.48404	1.30096	1.43141	1.24676
		180	1.48423	1.30197	1.43733	1.24776
		185	1.48443	1.30298	1.44223	1.24897
		190	1.48463	1.304	1.44611	1.25118
		195	1.48483	1.30501	1.45101	1.25319
		200	1.48503	1.30602	1.45417	1.2545
		205	1.48503	1.30676	1.45622	1.2558
		210	1.48503	1.30749	1.45805	1.25711
		215	1.48503	1.30823	1.4603	1.25841
		220	1.48503	1.30897	1.46224	1.25972
		225	1.48503	1.30934	1.46418	1.26093
		230	1.48503	1.3097	1.46591	1.26213
		235	1.48503	1.3097	1.46775	1.26334
		240	1.48503	1.3097	1.46918	1.26454
		245	1.48503	1.3097	1.4701	1.26575
		250	1.48503	1.3097	1.47101	1.26695
		255	1.48503	1.3097	1.47183	1.26816
		260	1.48503	1.3097	1.47265	1.26937
		265	1.48503	1.3097	1.47326	1.27057
		270	1.48503	1.3097	1.47378	1.27057
		275	1.48503	1.3097	1.47408	1.27057
		280	1.48503	1.3097	1.47428	1.27057
		285	1.48503	1.3097	1.47448	1.27057
		290	1.48503	1.3097	1.47469	1.27057
		295	1.48503	1.3097	1.47469	1.27057
		300	1.48503	1.3097	1.47469	1.27057
		305	1.48503	1.3097	1.47469	1.27057
		310	1.48503	1.3097	1.47469	1.27057
		315	1.48503	1.3097	1.47469	1.27057
		320	1.48503	1.3097	1.47469	1.27057
		325	1.48503	1.3097	1.47469	1.27057
		330	1.48503	1.3097	1.47469	1.27057
		335	1.48503	1.3097	1.47469	1.27057
		340	1.48503	1.3097	1.47469	1.27057
		345	1.48503	1.3097	1.47469	1.27057
		350	1.48503	1.3097	1.47469	1.27057
		355	1.48503	1.3097	1.47469	1.27057
		360	1.48503	1.3097	1.47469	1.27057
		365	1.48503	1.3097	1.47469	1.27057
		370	1.48503	1.3097	1.47469	1.27057
		375	1.48503	1.3097	1.47469	1.27057
		380	1.48503	1.3097	1.47469	1.27057
		385	1.48503	1.3097	1.47469	1.27057
		390	1.48503	1.3097	1.47469	1.27057
		395	1.48503	1.3097	1.47469	1.27057
		400	1.48503	1.3097	1.47469	1.27057

## Sheet: Figure 10
			IFT at 25C
			CWHC	CHHC		Figure 10 in the manuscript
			CW-decane	CO2-water-decane
		10	42.894	52.025
		20	48.1589	55.5417
		30	54.3307	57.1286
		40	56.8763	59.1875
		50	59.3633	61.5
		60	63.78	65.57
		70	40.923	43.5
		80	34.2173	35.8
		90	31.2728	32.9
		100	30.2326	31.9
		120	29.65	31.05
		140	29.14	31.04
		160	28.85	31.15
